# Supplementary material for: Key SARS-CoV-2 Mutations of Alpha, Gamma, and Eta Variants Detected in Urban Wastewaters in Italy by Long-Read Amplicon Sequencing Based on Nanopore Technology
Source: MDPI journal article supplement (doi:10.3390/w13182503), 2021-09-13

## SUPPLEMENTARY MATERIAL

**Table S1. Results of real-time RT-qPCR detection of SARS-CoV-2 in the tested samples**

| Sample ID | Recovery (%) | g.c. / $\mu$ L of RNA | g.c. / L of sewage | PCR ID 980 |
|-----------|--------------|-----------------------|--------------------|------------|
| 4158      | 1.71%        | 6.09                  | $1.52 \times 10^4$ | +          |
| 4159      | 1.28%        | 6.04                  | $1.51 \times 10^4$ | +          |
| 4160      | 5.31%        | 2.40                  | $6.00 \times 10^3$ | -          |
| 4161      | 2.52%        | not detected          | -                  | -          |
| 4162      | 1.61%        | 5.09                  | $1.27 \times 10^4$ | +          |
| 4163      | 2.11%        | 36.26                 | $9.06 \times 10^4$ | +          |
| 4170      | 2.12%        | 3.50                  | $8.75 \times 10^3$ | -          |
| 4171      | 2.35%        | 2.11                  | $5.27 \times 10^3$ | -          |
| 4172      | 3.06%        | 19.39                 | $4.85 \times 10^4$ | +          |
| 4173      | 1.91%        | 27.77                 | $6.94 \times 10^4$ | +          |
| 4174      | 6.16%        | 1.07                  | $2.68 \times 10^3$ | -          |
| 4175      | 4.52%        | 0.78                  | $1.94 \times 10^3$ | -          |

**Table S2. Number of raw and final reads selected after filtering steps**

| Sample ID | Raw Data | dual-barcode filtering | HiFi (q 8. trim end 20) + 1400-1700 nt | Aligned to SARS-CoV-2 reference sequence NC_045512 |
|-----------|----------|------------------------|----------------------------------------|----------------------------------------------------|
| BC01      | 1367887  | 370776                 | 312766                                 | 312697                                             |
| BC02      | 1925893  | 668332                 | 328851                                 | 328701                                             |
| BC03      | 764517   | 188387                 | 331399                                 | 330950                                             |

**Table S3. Concatenated mutations queried using the BAMQL tool v1.6 for the detection of each VOC/VOI**

| <b>Variant</b> | <b>Mutations</b><br>(aa substitutions<br>or deletions) | <b>Queries</b>                                                                                                      |
|----------------|--------------------------------------------------------|---------------------------------------------------------------------------------------------------------------------|
| <b>Alpha</b>   | 69-70del<br>144del<br>N501Y<br>A570D                   | 21764.A and 21771.T and exclude(21765.T. 21769.T)<br>21990.T and 21994.T and exclude(21992.T)<br>23063.T<br>23271.A |
| <b>Beta</b>    | D80A<br>D215G<br>K417N<br>E484K<br>N501Y               | 21801.C<br>22206.G<br>22813.T<br>23012.A<br>23063.T                                                                 |
| <b>Gamma</b>   | D138Y<br>R190S<br>K417T<br>E484K<br>N501Y              | 21794.T<br>22132.T<br>22812.C<br>23012.A<br>23063.T                                                                 |
| <b>Delta</b>   | 156-157-158del<br>L452R<br>T478K                       | 22028.G and 22035.G and exclude(22029.A. 22034.A)<br>22917.G<br>22995.A                                             |
| <b>Eta</b>     | A67V<br>69-70del<br>144del<br>E484K                    | 21762.T<br>21764.A and 21771.T and exclude(21765.T. 21769.T)<br>21990.T and 21994.T and exclude(21992.T)<br>23012.A |

Numbers represent nucleotide positions referred to SARS-CoV-2 reference genome NC\_045512. Reads were queried for concatenated mutations by: a) selecting defined nucleotide mutations; b) for deletions, by searching for the absence of a wild type nucleotide within the deleted region, in combination with the presence of the wild type nucleotide upstream (5') and downstream (3') of the deletion. This latter search criterion was included to minimize selection of random deletions generated by nanopore sequencing.

Figure S1. AlleleClusterSummary for pool BC01 (Clustering unsupervised results)

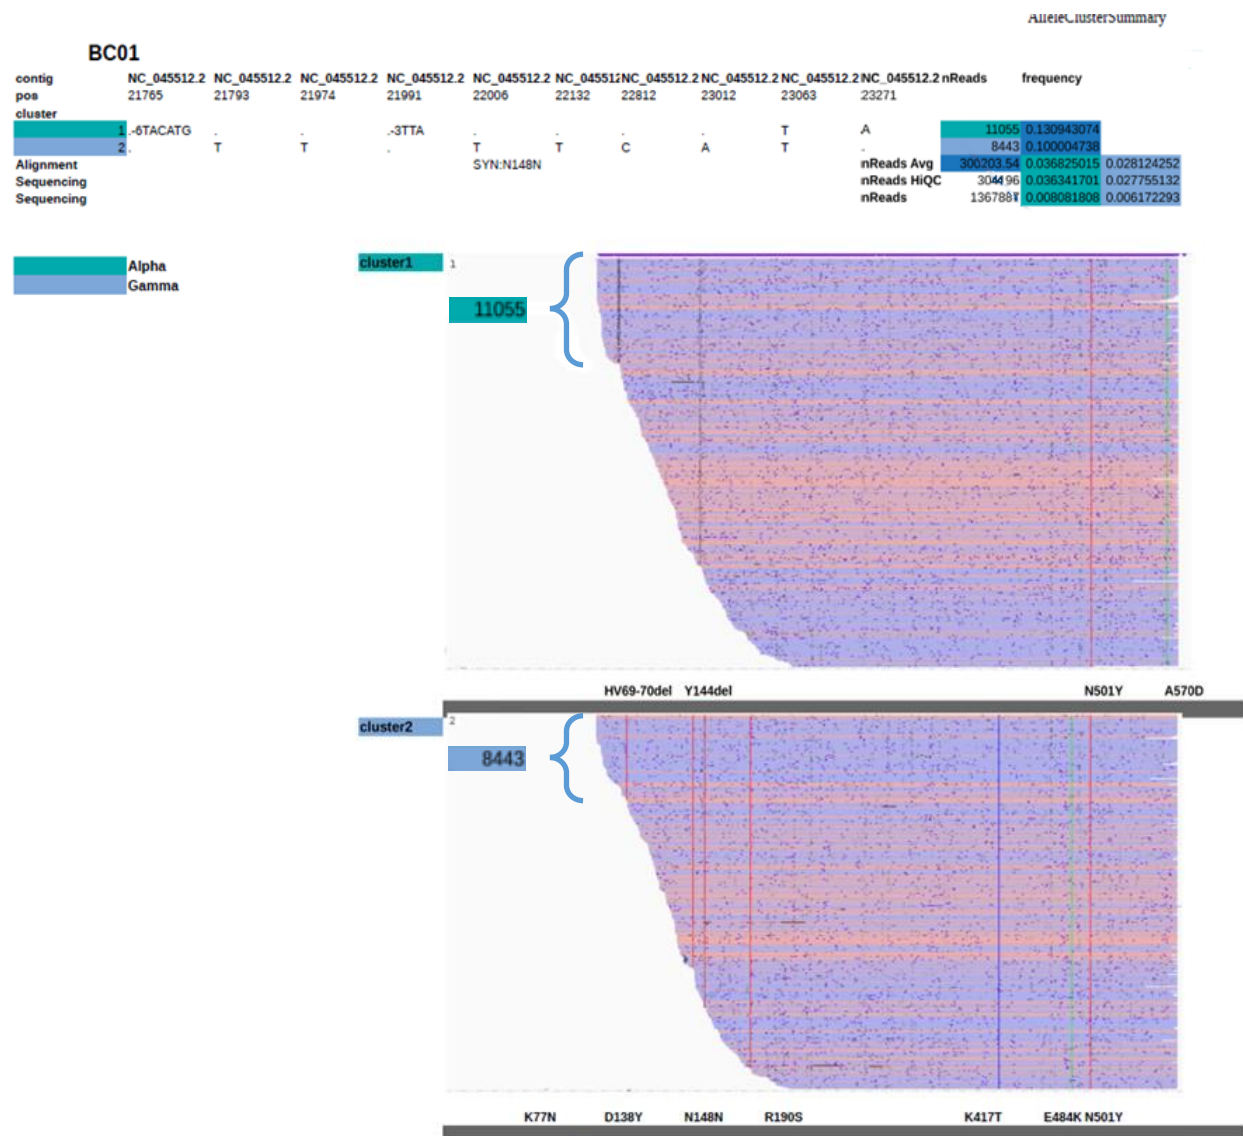

**Mutation panel of SARS-CoV-2 Alpha, Gamma and Eta variants in wastewaters in Italy detected by nanopore technology long-read amplicon sequencing** La Rosa G., Brandtner D., Mancini P., Veneri C., Bonanno Ferraro G., Bonadonna L., Lucentini L., Suffredini E.  
*Water*

**Figure S2. Mutations detected in the alpha cluster**

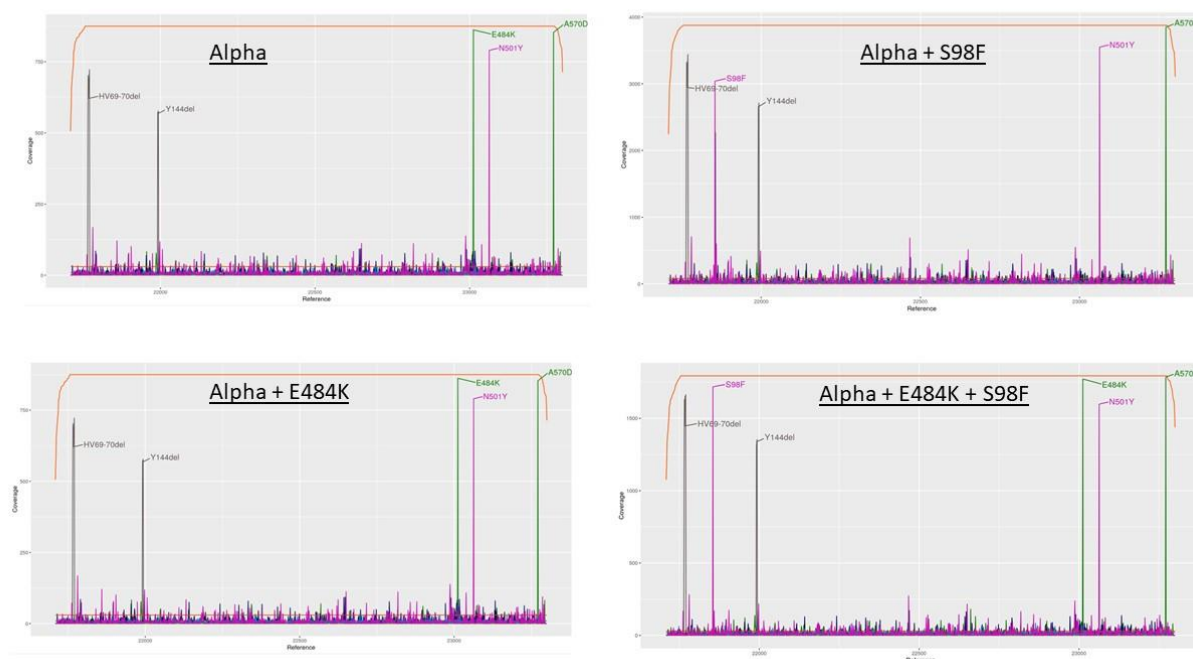

**Figure S3. Mutations detected in the eta cluster**

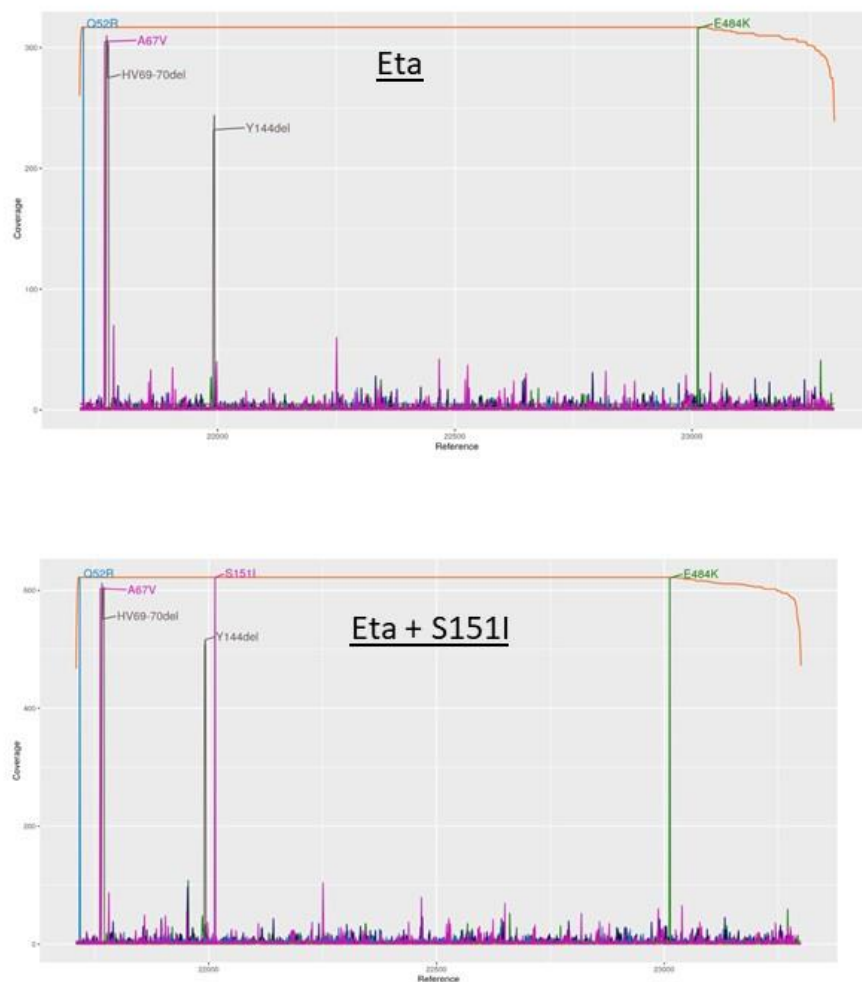

**Figure S4. Venn diagrams for Alpha and Eta reads in pool BC02**

**BARCODE02**

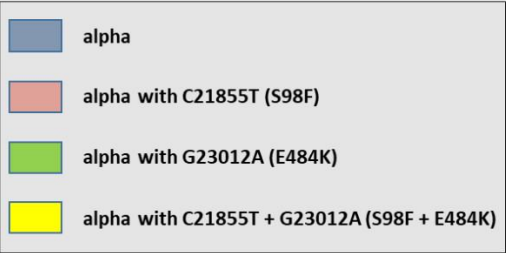

**ALPHA BAMQL**

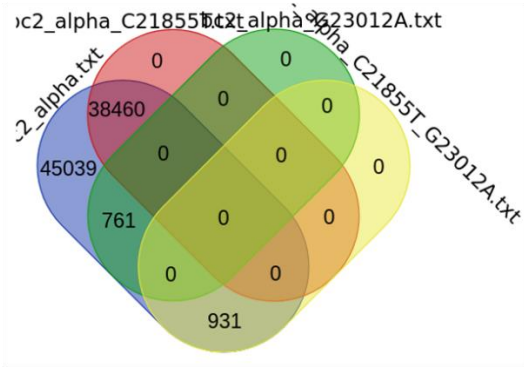

**ETA BAMQL**

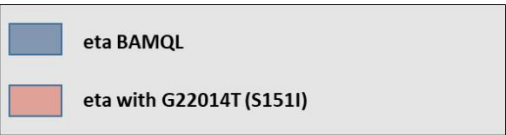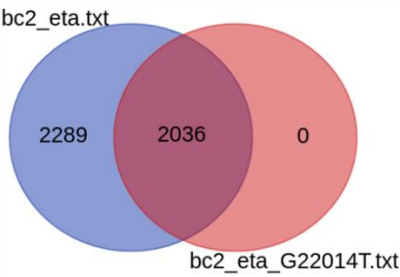

**Figure S5. Distribution of small deletions in assigned reads (A) and in unassigned reads (B): small deletions are significantly more frequent in unassigned reads**

(Snapshots from IGV alignment viewer)

**A**

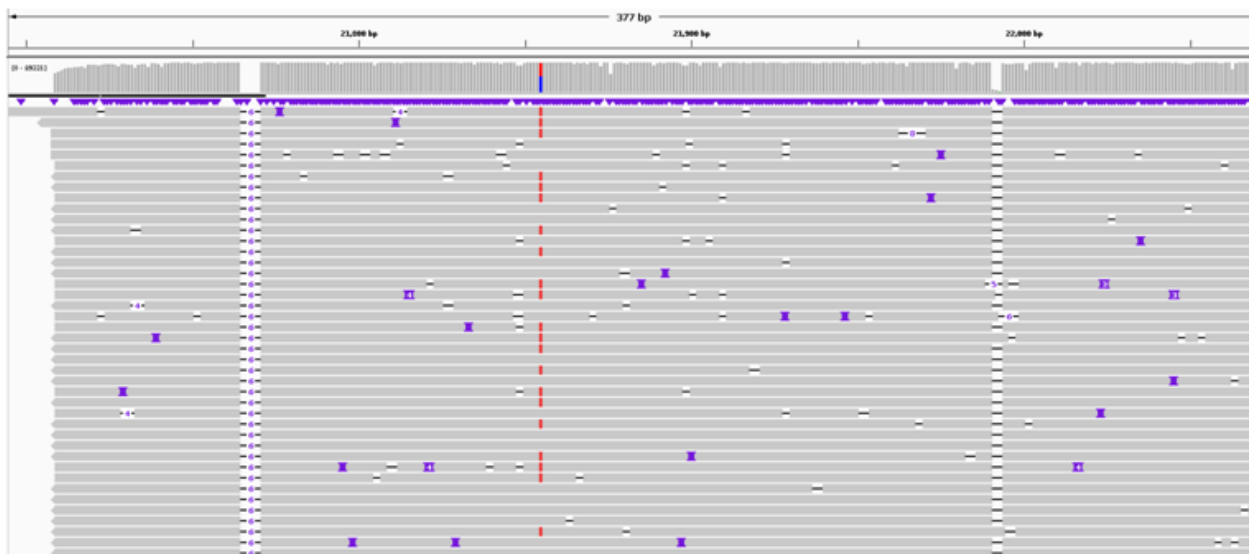

**B**

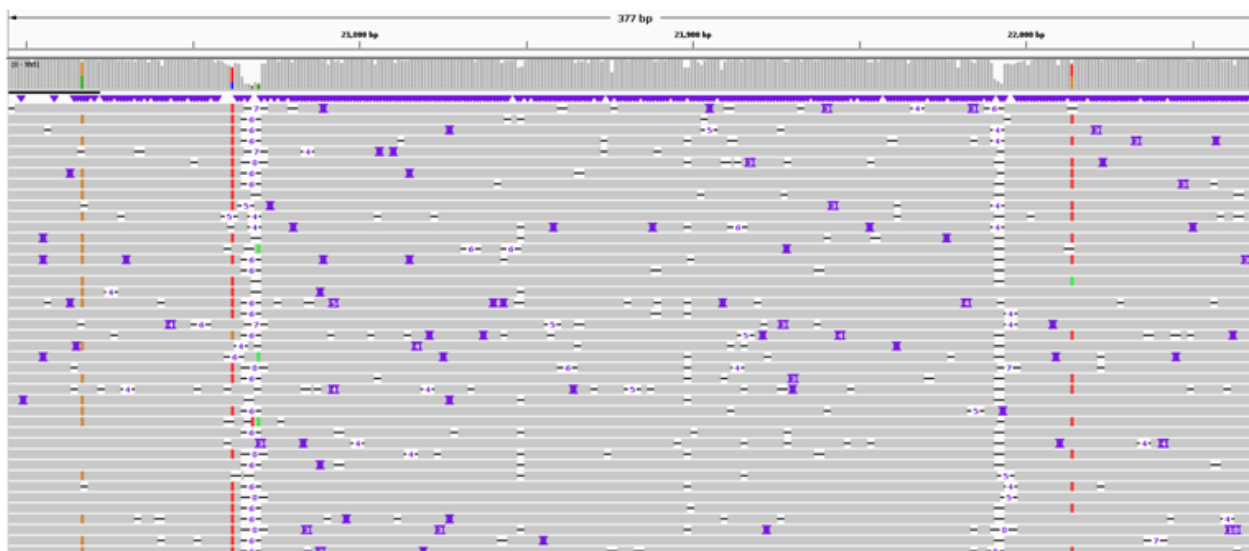

**Figure S6. Insertion/Deletion analysis in assigned reads (A) and unassigned reads (B): in unassigned reads Ins/Del ratio is exceedingly low in the range of 10 bases indicating an abundance of small deletions in comparison to assigned reads**

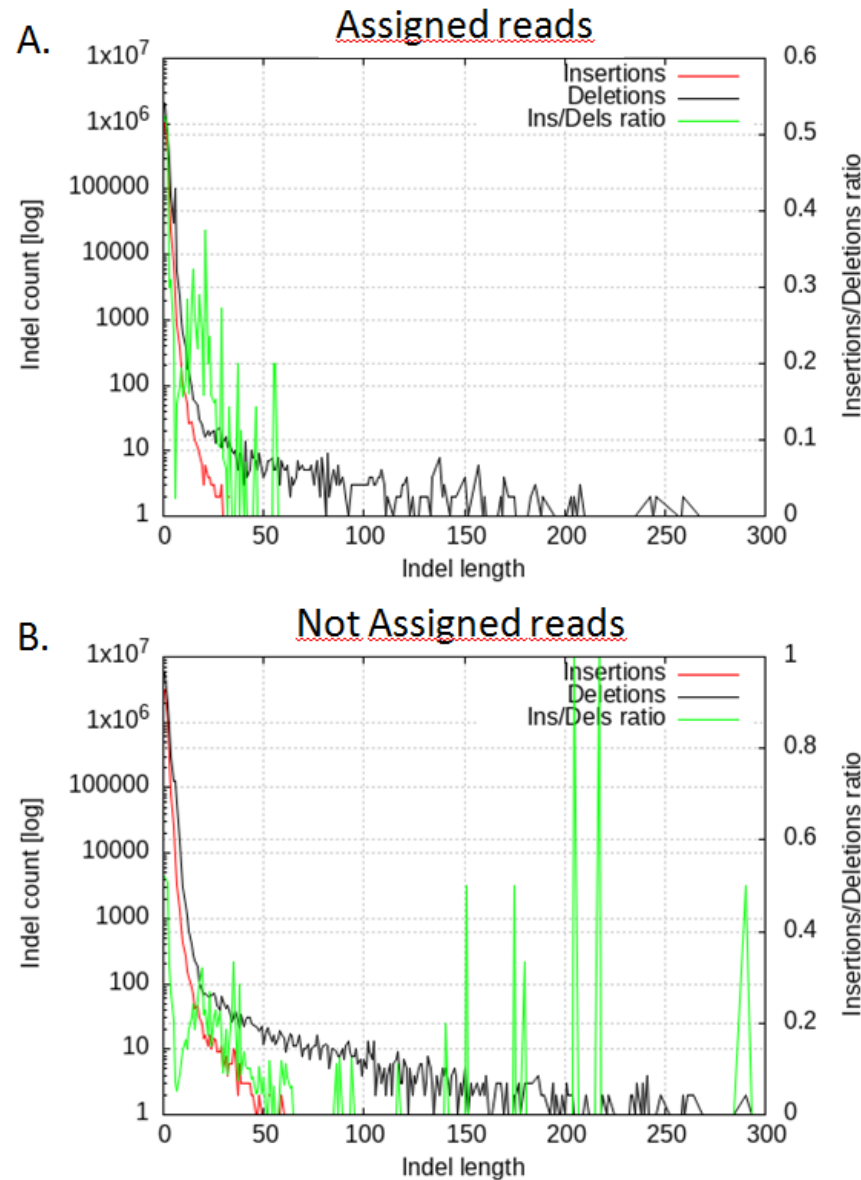

Supplement: s1 [file s1]
